# Supplementary material for: An Electrochemically Prepared Mixed Phase of Cobalt Hydroxide/Oxyhydroxide as a Cathode for Aqueous Zinc Ion Batteries
Source: MDPI journal article supplement (doi:10.3390/inorganics11100400), 2023-10-12
Supplement: s1 [file s1]

# Supporting Information

Figure S1 to S6 & Table S1 and S2

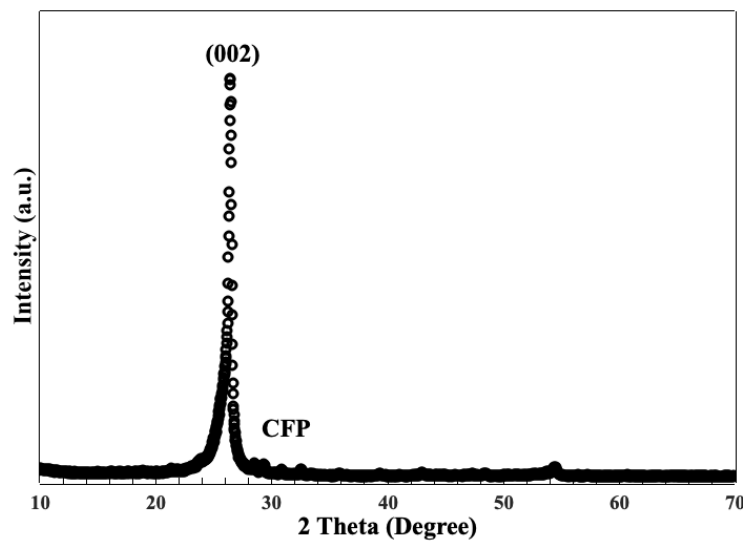

Figure S1. The XRD pattern of CFP.

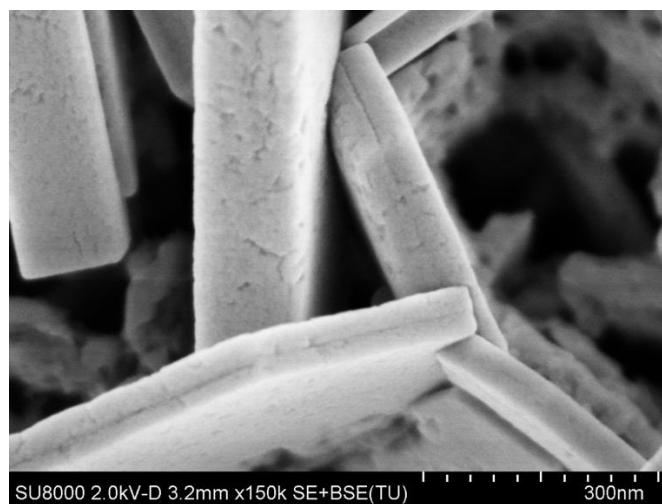

**Figure S2.** The SEM image after the CV treatment.

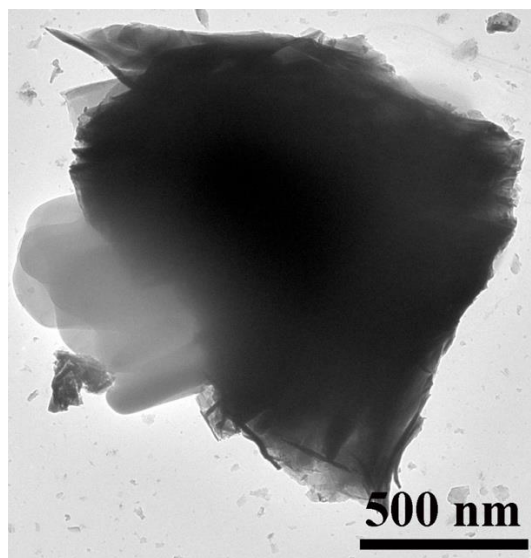

**Figure S3.** The TEM image after the CV treatment.

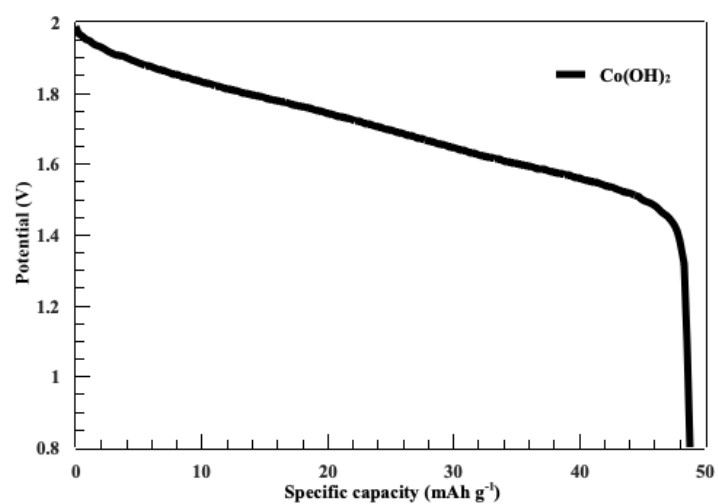

**Figure S4.** Discharge profiles of  $\beta\text{-Co(OH)}_2$  at  $0.1 \text{ A g}^{-1}$ .

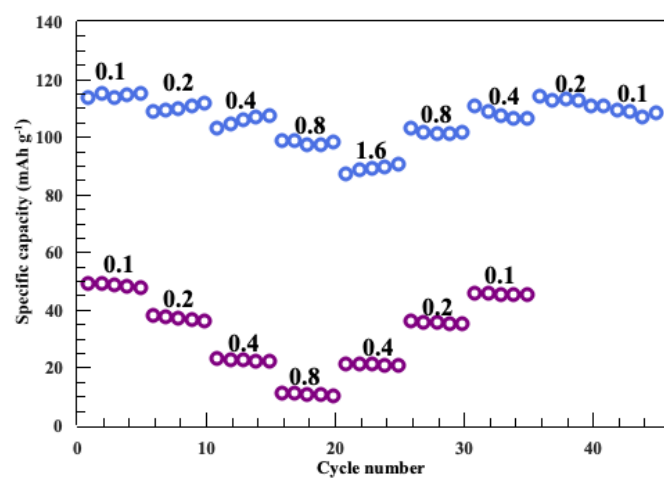

**Figure S5.** The rate performance comparison of  $\beta$ -Co(OH)<sub>2</sub> and the mixed phase.

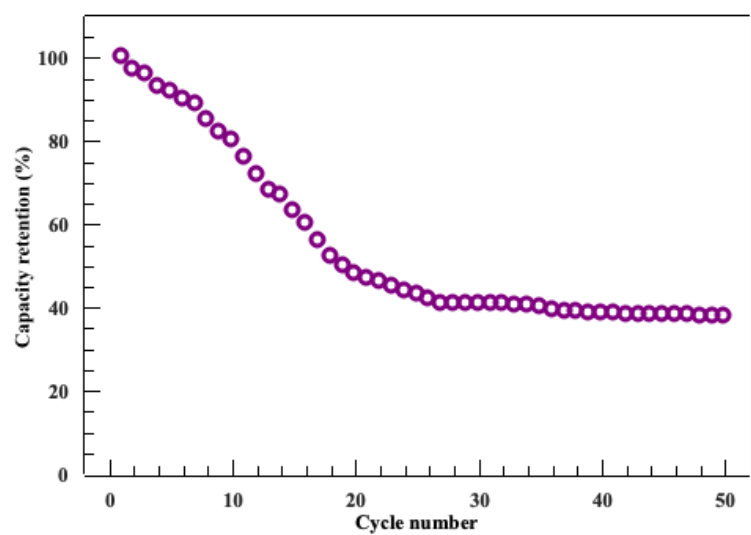

**Figure S6.** The stability test of  $\beta\text{-Co(OH)}_2$  at  $0.1 \text{ A g}^{-1}$ .

**Table S1.** Total energy values (in eV) for the minima and the transition state shown in Figure 4.

| <b>State</b>              | <b>Energy</b> |
|---------------------------|---------------|
| <b>Co(OH)<sub>2</sub></b> | -42.800       |
| <b>Transion state</b>     | -42.050       |
| <b>CoOOH</b>              | -43.400       |

**Table S2.** The fitting results of the EIS spectra of the mixed phase of Co(OH)<sub>2</sub> and CoOOH.

| <b>Sample</b>              | <b>R<sub>ct</sub> (Ω)</b> | <b>R<sub>s</sub> (Ω)</b> | <b>W (S·sec<sup>0.5</sup>)</b> |
|----------------------------|---------------------------|--------------------------|--------------------------------|
| Co(OH) <sub>2</sub> /CoOOH | 2.1                       | 8                        | 0.44                           |
